# Supplementary material for: Adaptive liquid interfaces induce neuronal differentiation of mesenchymal stem cells through lipid raft assembly
Source: PubMed Central journal article supplement (PMC9166733; doi:10.1038/s41467-022-30622-y), 2022-06-03
Supplement: 41467_2022_30622_MOESM1_ESM.pdf [file 41467_2022_30622_MOESM1_ESM.pdf]

## Supplementary Materials for

### **Adaptive liquid interfaces induce neuronal differentiation of mesenchymal stem cells through lipid raft assembly**

Xiaofang Jia,<sup>1\*</sup> Jingwen Song,<sup>2,3</sup> Wenyan Lv,<sup>1</sup> Jonathan P. Hill,<sup>2</sup> Jun Nakanishi,<sup>4\*</sup>  
and Katsuhiko Ariga<sup>2,3\*</sup>

\*Corresponding author. Email: [jiaxf5@mail.sysu.edu.cn](mailto:jiaxf5@mail.sysu.edu.cn) (X. J.),

[NAKANISHI.Jun@nims.go.jp](mailto:NAKANISHI.Jun@nims.go.jp) (J. N.), [ARIGA.Katsuhiko@nims.go.jp](mailto:ARIGA.Katsuhiko@nims.go.jp) (K. A.)

#### **This PDF file includes:**

Supplementary Figs. 1 to 11

Supplementary Table 1 to 2

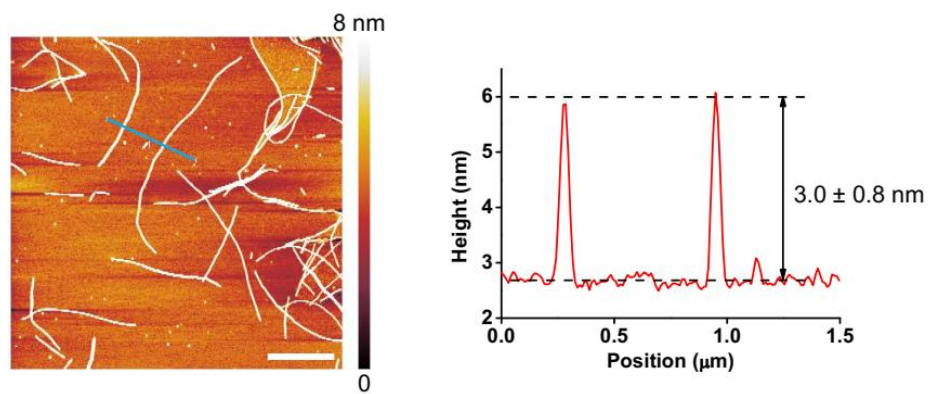

**Supplementary Fig. 1** DFM images and the corresponding height profiles of protein nanofibrils. Scale bar: 1 μm.

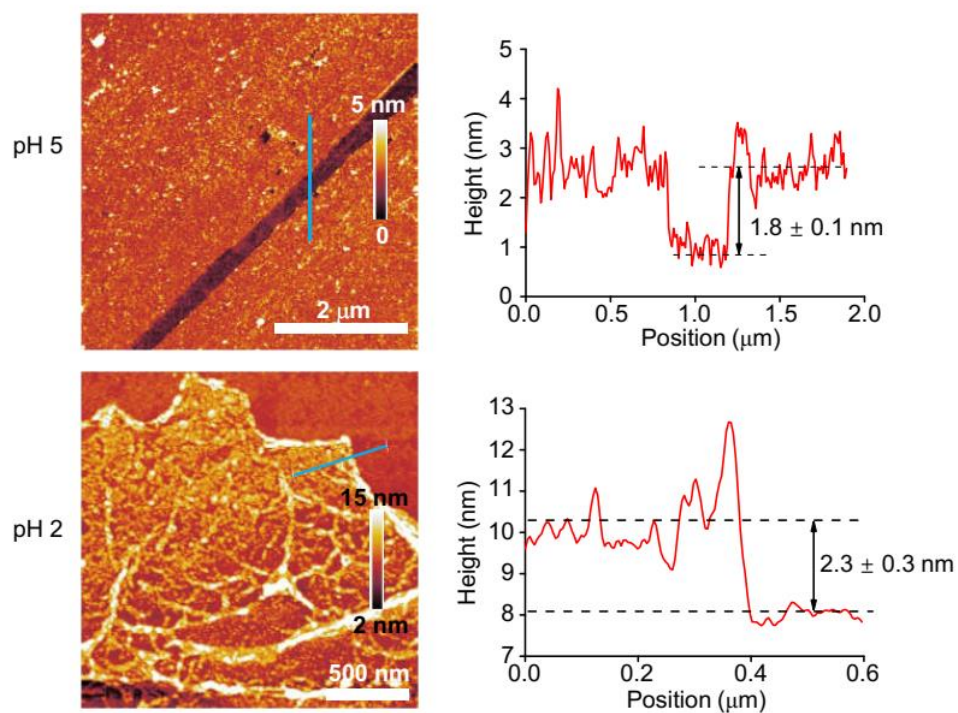

**Supplementary Fig. 2** DFM images and the corresponding height profiles of protein nanosheets assembled at the PFO/water interface at pH 5 and pH 2.

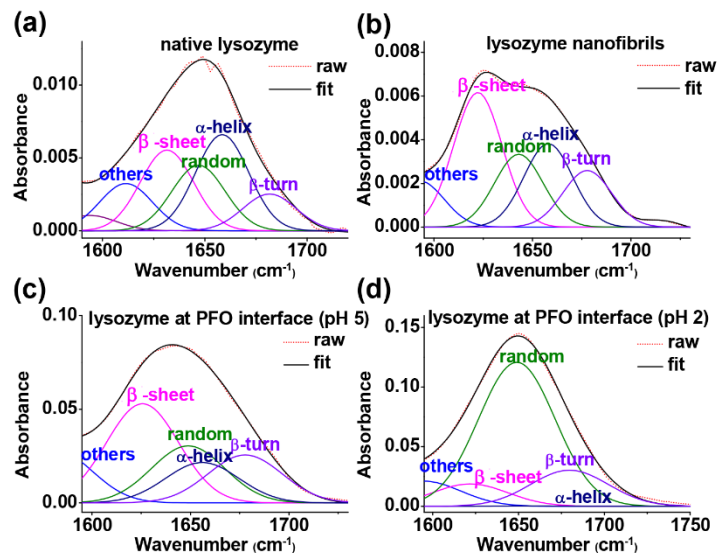

**Supplementary Fig. 3** ATR-FTIR spectra of (a) native lysozyme solution, (b) lysozyme nanofibrils solution, and (c, d) dried lysozyme nanosheets assembled at the PFO interface at (c) pH 5 and (d) pH 2. Curve fitting of amide I spectra was carried out using Peakfit software.

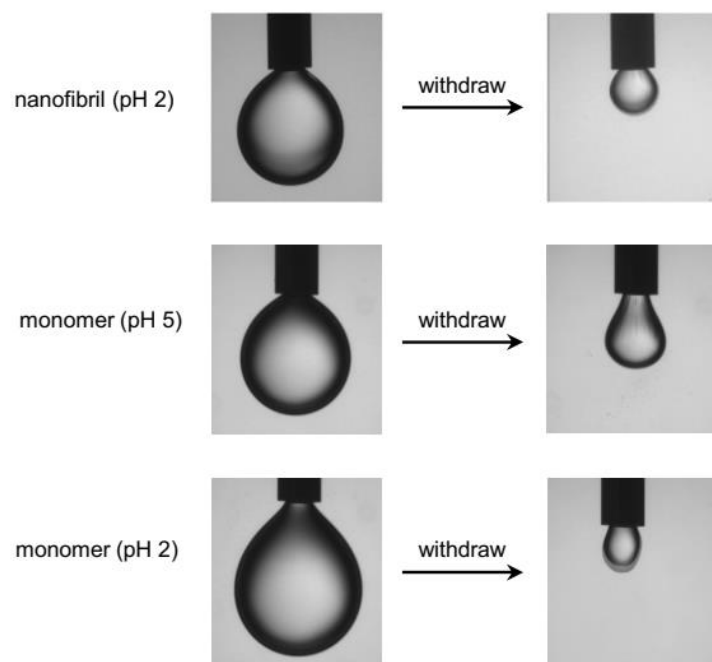

**Supplementary Fig. 4** Images of the snapshots during PFO phase is withdrawn from the droplet in the bath of lysozyme nanofibrils solution at pH 2, lysozyme monomer solution at pH 5 or lysozyme monomer solution at pH 5.

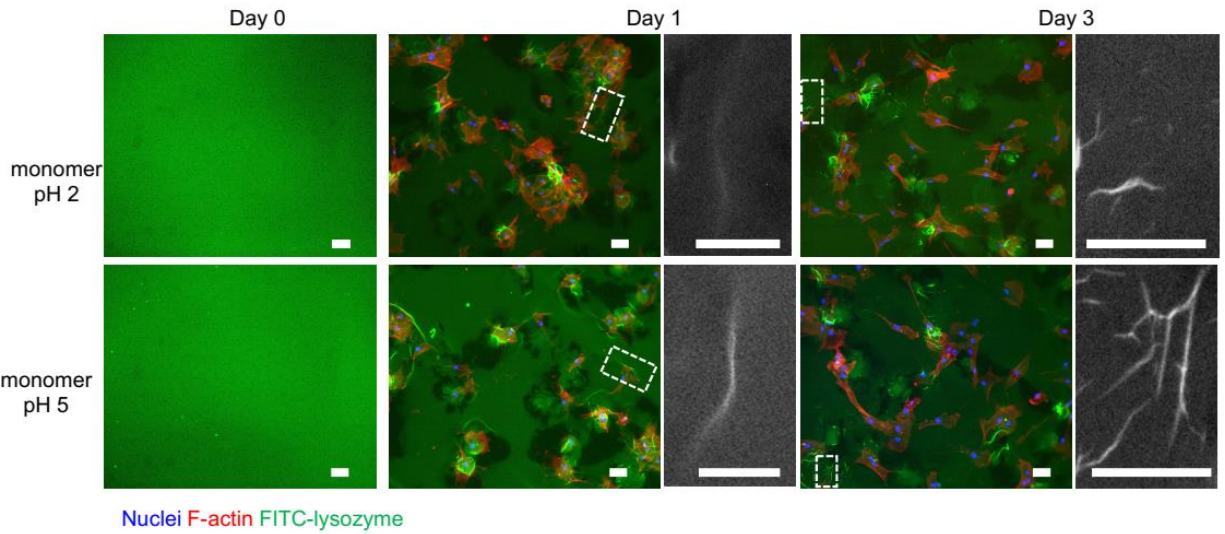

**Supplementary Fig. 5 Protein nanosheets at liquid interface adapt dynamically to cell traction forces.** Time-series images of protein nanosheets assembled at different pH before cell seeding (Day 0) and following remodeling by hMSCs after 1 d and 3 d. Dashed rectangle designates region shown with FITC-lysozyme channel isolated on the right. Nuclei in blue, FITC-lysozyme in green, F-actin in red, scale bar: 40  $\mu\text{m}$ .

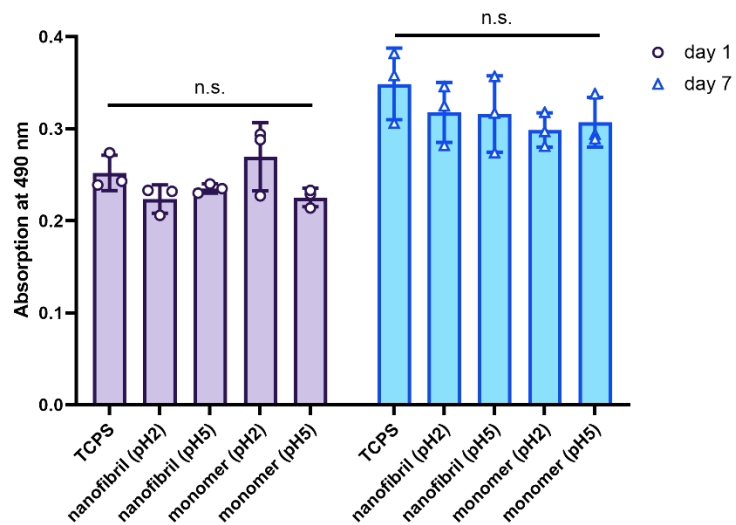

**Supplementary Fig. 6** Cell viability of hMSCs after 1 day and 7 days culture on the monolayer of lysozyme nanofibril and monomer at the PFO interface using MTS assay. hMSCs cultured on tissue culture polystyrene (TCPS) as control.  $n = 3$ , mean  $\pm$  s.d., two-tailed Student's  $t$ -test.

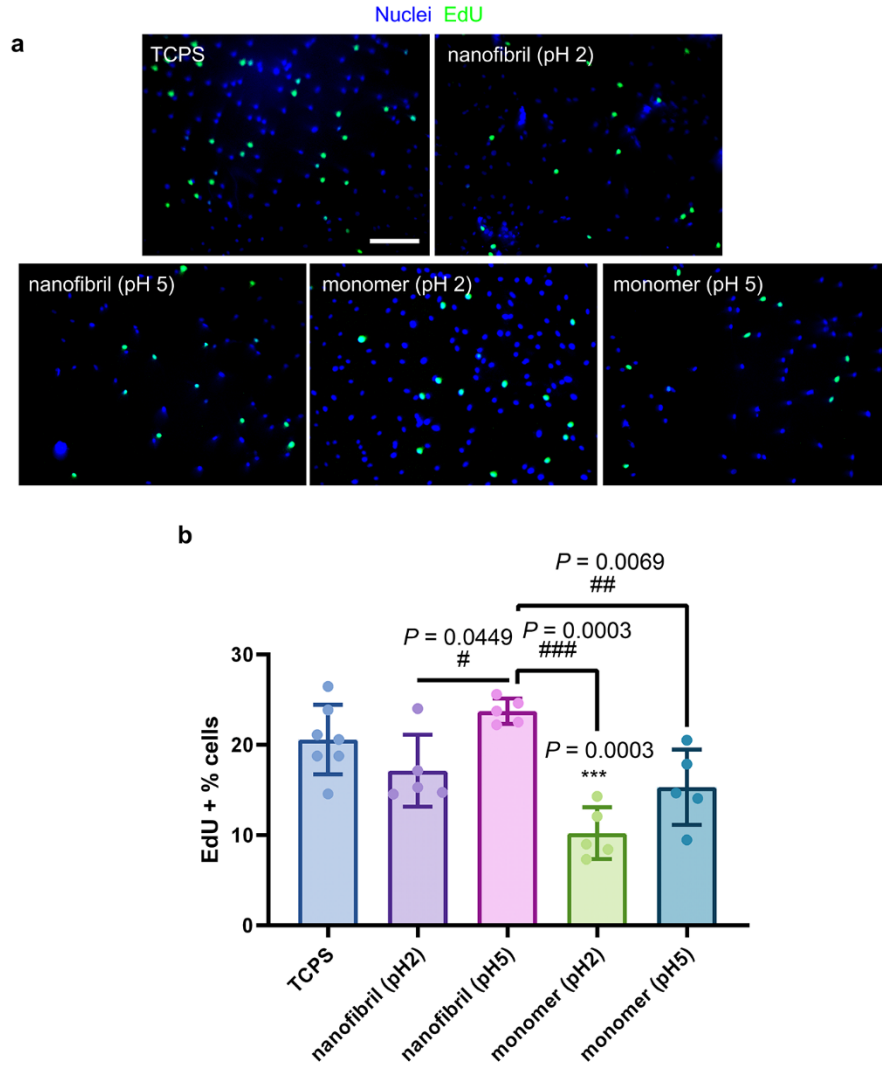

**Supplementary Fig. 7 Cell proliferation between day 2 and day 3 culture on the monolayer of lysozyme nanofibril and monomer at PFO interface. a** Representative immunofluorescence images of hMSCs after EdU incorporation for 24 h. Nuclei in blue, EdU in green, scale bar :100  $\mu$ m. hMSCs cultured on tissue culture polystyrene (TCPS) as control. **b** Percentage of hMSCs positive for EdU staining. \*\*\* $P < 0.001$  vs TCPS, # $P < 0.05$ , ## $P < 0.01$ , ### $P < 0.001$ , one-way ANOVA with Turkey's test, each data point represents an independent slide from two independent experiments.



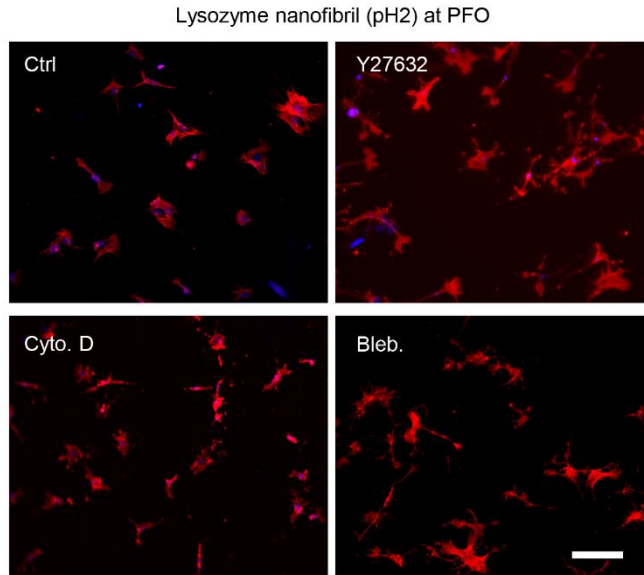

**Supplementary Fig. 8** Representative fluorescence images of hMSCs on the monolayers of lysozyme nanofibrils at the PFO/water interface at pH 2 after 2 h of no treatment (control), or treatment with an inhibitor.

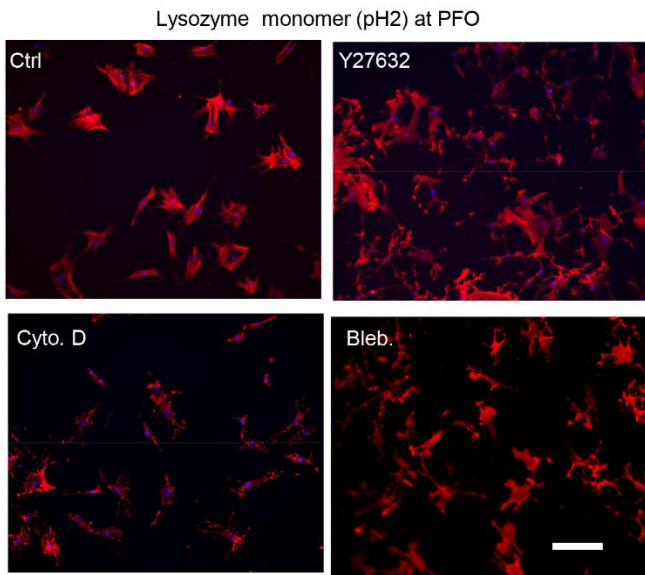

**Supplementary Fig. 9** Representative fluorescence images of hMSCs on the monolayers of lysozyme monomers at the PFO/water interface at pH 2 after 2 h of no treatment (control), or treatment with an inhibitor.

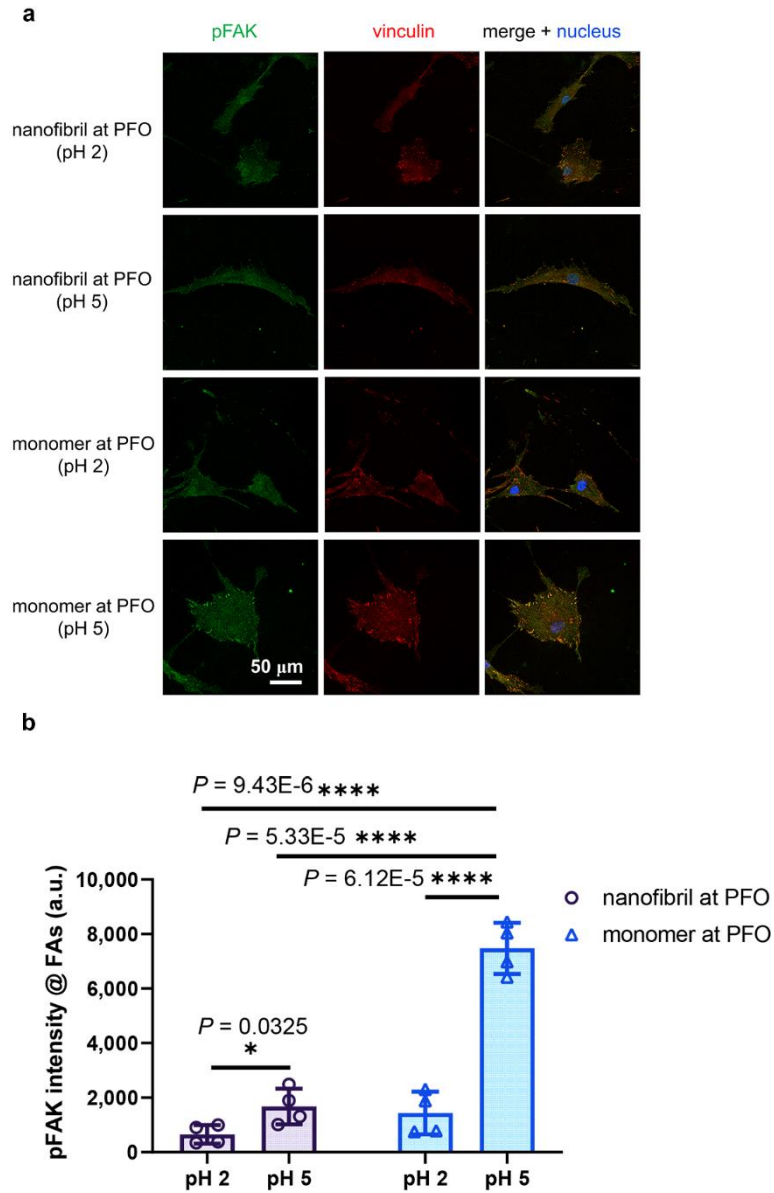

**Supplementary Fig. 10 The expression of pFAK at focal adhesion sites of hMSCs at PFO interface.**  
**a** Representative immunofluorescence confocal images of hMSCs at the PFO interface. green: pFAK, red: vinculin, blue: nuclei, scale bar: 50  $\mu\text{m}$ . **b** pFAK intensity at focal adhesion sites of hMSCs at the PFO interface. a.u.: arbitrary units. Bars and error bars indicate the mean  $\pm$  s.d.  $n = 4$ , \* $P < 0.05$ , \*\*\*\* $P < 0.0001$ , one-way ANOVA with Bonferroni post hoc.

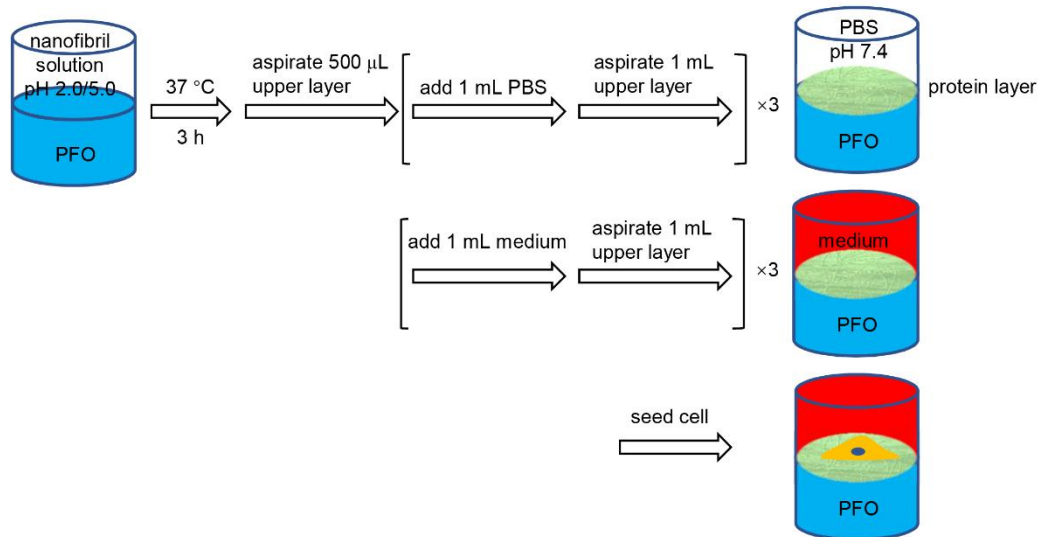

**Supplementary Fig. 11** Schematic of cell culture on two-dimensional networks of protein nanofibrils at a liquid-liquid interface.

**Supplementary Table 1.** Percentage distributions of lysozyme secondary structures and the area ratio of amide I to amide II band before and after interaction with PFO as measured by ATR-FTIR spectroscopy.

| protein                     | secondary structure |                |               |        |        | area ratio (amide I/II) |
|-----------------------------|---------------------|----------------|---------------|--------|--------|-------------------------|
|                             | $\alpha$ -helix     | $\beta$ -sheet | $\beta$ -turn | random | others |                         |
| native lysozyme in solution | 28.2                | 23.6           | 10.8          | 19.2   | 18.3   | 1.20                    |
| lysozyme nanofibrils        | 22.8                | 36.8           | 15.5          | 19.9   | 5.0    | 1.39                    |
| lysozyme at PFO (pH 5)      | 15.4                | 37.2           | 18.4          | 21.6   | 7.6    | 1.25                    |
| lysozyme at PFO (pH 2)      | 0.2                 | 10.3           | 17.0          | 66.9   | 5.7    | 1.81                    |

**Supplementary Table 2.** Primer sequences for RT-qPCR used in this work.

| <b>Gene</b>  | <b>Forward primer</b>          | <b>Reverse primer</b>      |
|--------------|--------------------------------|----------------------------|
| <i>GAPDH</i> | TCA ACG GAT TTG GTC GTA TTG GG | TGA TTT TGG AGG GAT CTC GC |
| <i>TUBB3</i> | AGC CAG CAG TGT CTA AAC CC     | GGG AGG ACG AGG CCA TAA AT |
| <i>MAP2</i>  | CCA CCA GGT CAG AGC CAA TT     | CTT CTT CTC ACT CGG CAC CA |
